# Supplementary material for: Development of a novel Cd(ii) metal complex for solvent-sensitive detection of Zn(ii) and Mg(ii) with the formation of Cd(ii)–Zn(ii)/Cd(ii)–Mg(ii) complexes and their application in effective Schottky devices
Source: Royal Society of Chemistry journal article supplement (doi:10.1039/d3nj04660e), 2023-12-20
Supplement: d3nj04660e1.pdf [file d3nj04660e1.pdf]

## **Development of a novel Cd(II) metal complex for solvent sensitive detection of Zn(II) and Mg(II) with the formation of Cd(II)-Zn(II)/Cd(II)-Mg(II) complexes and their application in effective schottky devices**

Dibyendu Sathapat <sup>a</sup>, Mainak Das<sup>b</sup>, Manik Das<sup>a</sup>, Uttam Kumar Das<sup>c</sup>, Arijit Bag<sup>d</sup>, Soumik Laha<sup>e</sup>, Partha Pratim Roy<sup>b</sup>, Bidhan Chandra Samanta<sup>f</sup>, Tithi Maity<sup>a\*</sup>

Department of Chemistry, Prabhat Kumar College, Contai, Contai, Purba Medinipur, West Bengal, India

<sup>b</sup> Department of Physics, Jadavpur University, Kolkata, India

<sup>c</sup> Department of Chemistry, School of Physical Science, Mahatma Gandhi Central University, Bihar, India.

<sup>d</sup>School of Natural and Applied Sciences, Maulana Abul Kalam Azad University of Technology, West Bengal, India

<sup>e</sup>IICB, Kolkata, West Bengal, India

<sup>f</sup>Mugberia Gangadhar Mahavidyalaya, Purbamedinipur, West Bengal India

Email: [titlipkc2008@gmail.com](mailto:titlipkc2008@gmail.com)

| Figure/<br>Table No | Content                                                                                                                                                                                                                                                                              | Page<br>number |
|---------------------|--------------------------------------------------------------------------------------------------------------------------------------------------------------------------------------------------------------------------------------------------------------------------------------|----------------|
| <b>Fig. S1</b>      | FTIR of Complex 1                                                                                                                                                                                                                                                                    | S3             |
| <b>Fig. S2</b>      | FTIR of Complex 2                                                                                                                                                                                                                                                                    | S3             |
| <b>Fig. S3</b>      | FTIR of Complex 3                                                                                                                                                                                                                                                                    | S4             |
| <b>Fig. S4</b>      | Uv spectra of (a) Complex 1, (b) Complex 2, 3                                                                                                                                                                                                                                        | S4             |
| <b>Fig. S5</b>      | Mass spectra of Complex 1                                                                                                                                                                                                                                                            | S5             |
| <b>Fig. S6</b>      | Mass spectra of Complex 2                                                                                                                                                                                                                                                            | S5             |
| <b>Fig. S7</b>      | Mass spectra of Complex 3                                                                                                                                                                                                                                                            | S6             |
| <b>Fig S8</b>       | NMR spectrum of complex 1                                                                                                                                                                                                                                                            | S6             |
| <b>Fig S9</b>       | NMR spectrum of complex 2                                                                                                                                                                                                                                                            | S7             |
| <b>Fig S10</b>      | NMR spectrum of complex 3                                                                                                                                                                                                                                                            | S7             |
| <b>Fig. S11</b>     | The TGA graph for complex 2                                                                                                                                                                                                                                                          | S8             |
| <b>Fig. S12</b>     | EDX result of complex 2                                                                                                                                                                                                                                                              | S9             |
| <b>Fig. S13</b>     | Change of Emission Intensity of the complexes with the variation of pH                                                                                                                                                                                                               | S9             |
| <b>Fig. S14</b>     | Schematic presentation of the mechanism of sensing phenomena of complex 1 towards Zn(II) and Mg(II).                                                                                                                                                                                 | S10            |
| <b>Fig. S15</b>     | Change of Fluorescence intensity of complex 1 ( $3 \times 10^{-6}$ M) by varying the concentration of (a) Zn(II) ( $1.0 - 25 \times 10^{-6}$ M) in 9:1 ethanol-water medium and (b) Mg(II) ( $1.0 - 25 \times 10^{-6}$ M) in pure HEPES buffer solution for LOD calculation purpose. | S10            |
| <b>Fig. S16</b>     | Determination of Binding constant of (a) Complex 1 – Zn(II) and (b) Complex 1 – Mg(II) from Fluorescence titration results                                                                                                                                                           | S11            |
| <b>Fig. S17</b>     | Change of emission intensity of (a) complex1 – Zn(II) and (b) Complex1 – Mg(II) after the addition of several competitive metal ions.                                                                                                                                                | S11            |
| <b>Fig S18</b>      | The band gap values for a) complex 2 b) complex 3 by using Tauc plot                                                                                                                                                                                                                 | S12            |
| <b>Fig. S19</b>     | Intramolecular $\pi$ - $\pi$ interaction in complex 2                                                                                                                                                                                                                                | S12            |

|                  |                                                                |     |
|------------------|----------------------------------------------------------------|-----|
| <b>Table S1:</b> | Intra-molecular Hydrogen bonding parameter of complex <b>1</b> | S13 |
| <b>Table S2</b>  | <b>C-H... I</b> interaction parameter of complex <b>2</b>      | S13 |
| <b>Table S3</b>  | Crystal parameters of complex <b>1</b> and <b>2</b>            | S13 |

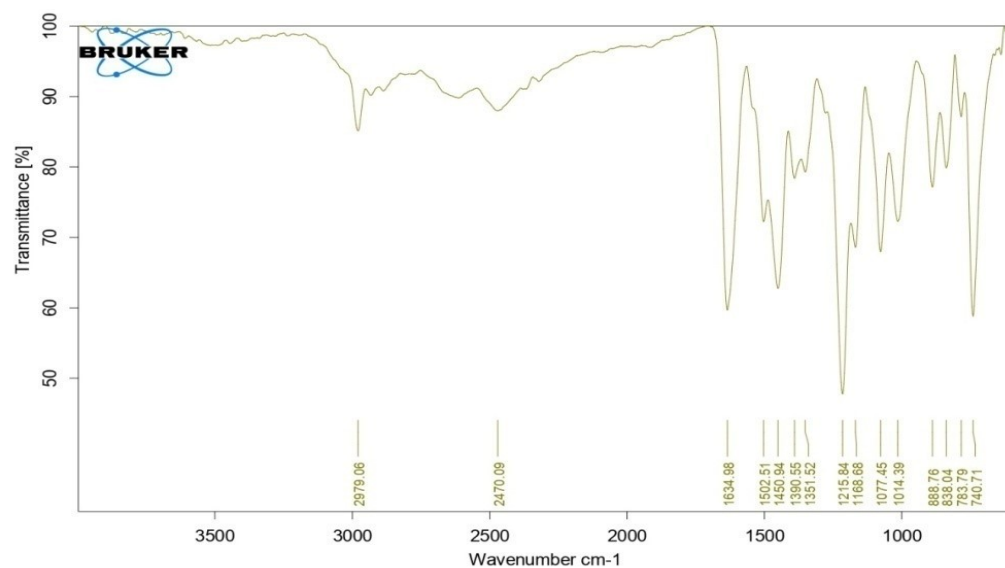

**Fig. S1.** FTIR of Complex **1**

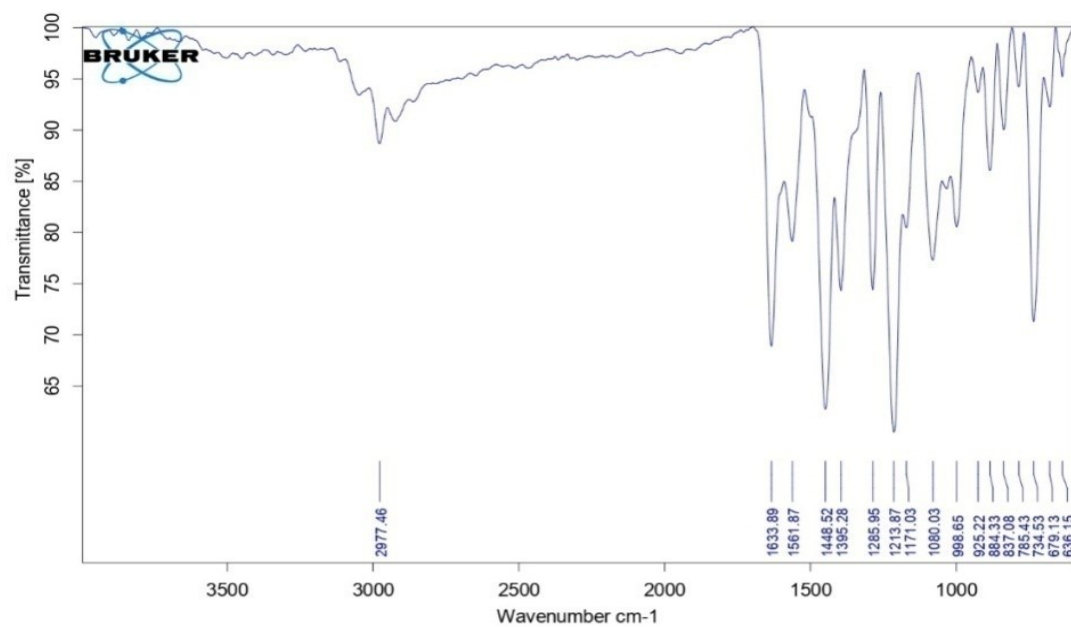

**Fig. S2.** FTIR of Complex **2**

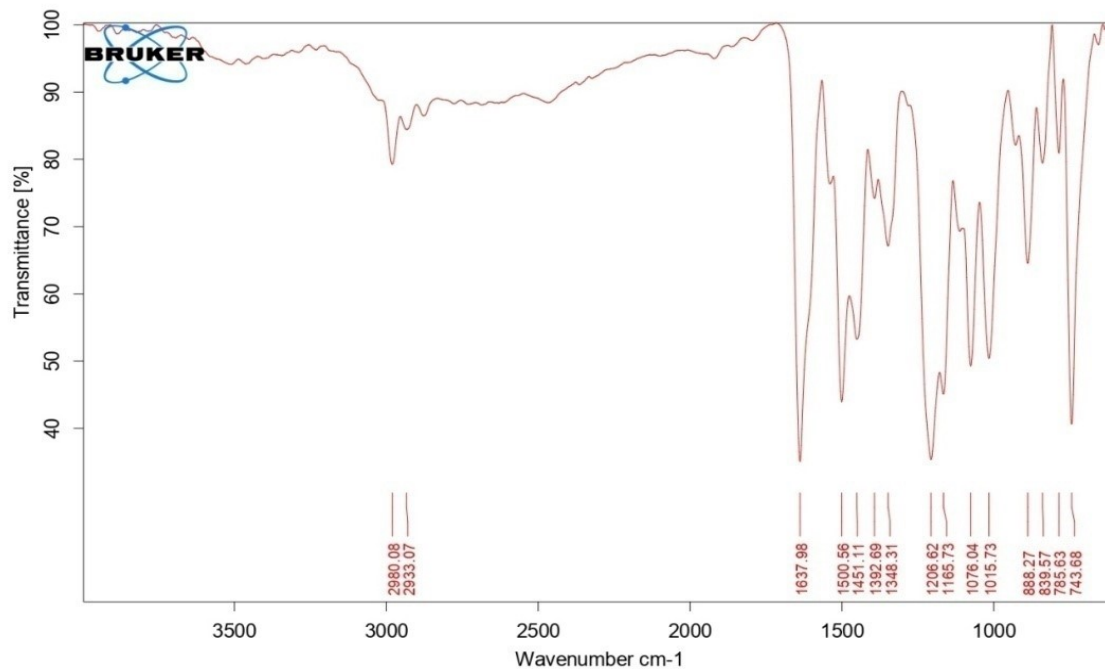

Fig. S3. FTIR of Complex 3

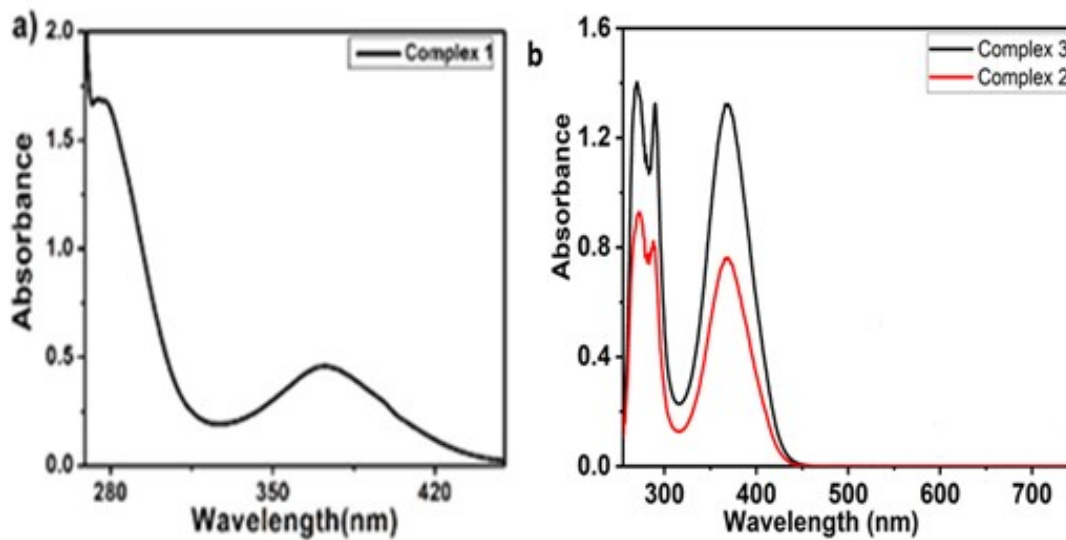

Fig. S4. Uv spectra of (a) Complex 1, (b) Complex 2 and 3

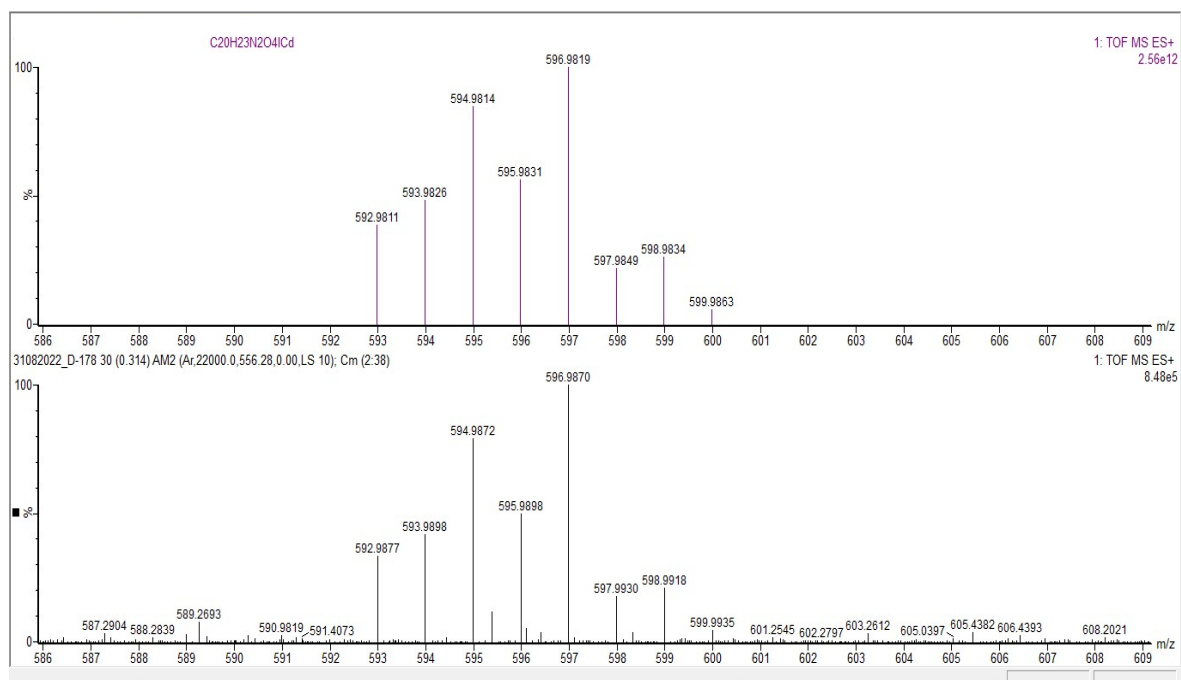

**Fig. S5.** Mass spectra of Complex 1

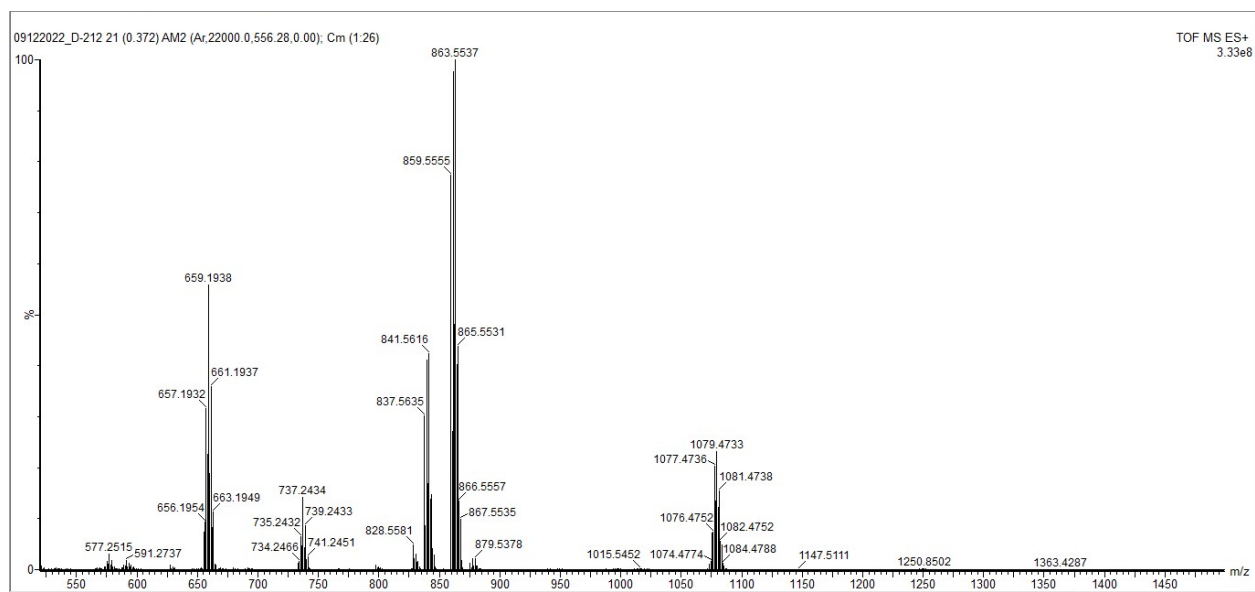

**Fig. S6.** Mass spectra of Complex 2

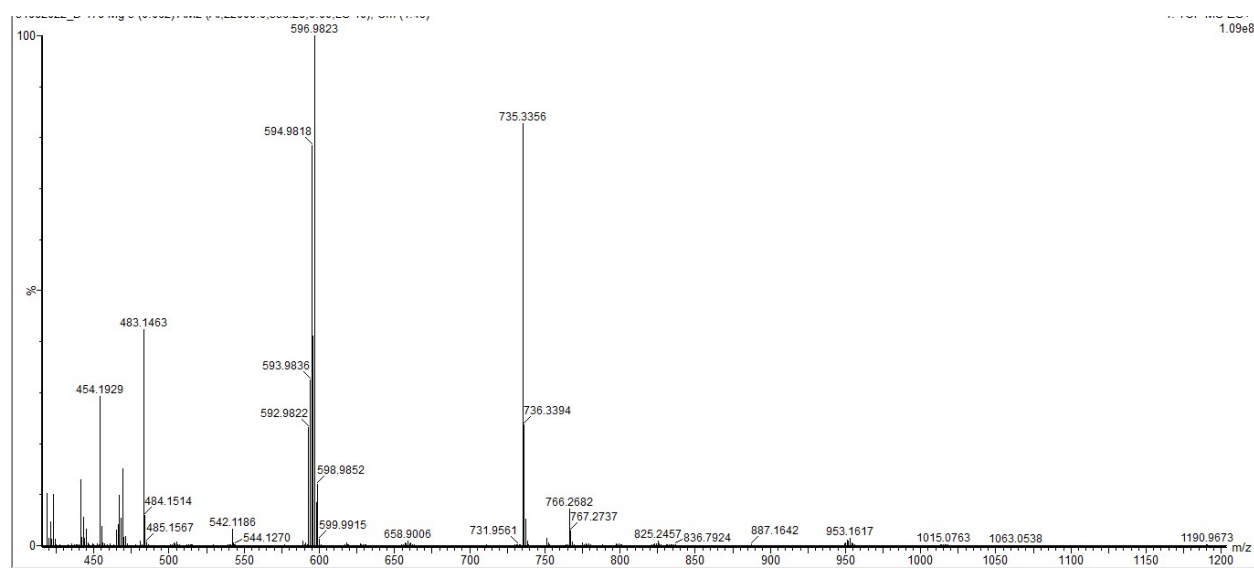

**Fig. S7.** Mass spectra of Complex 3

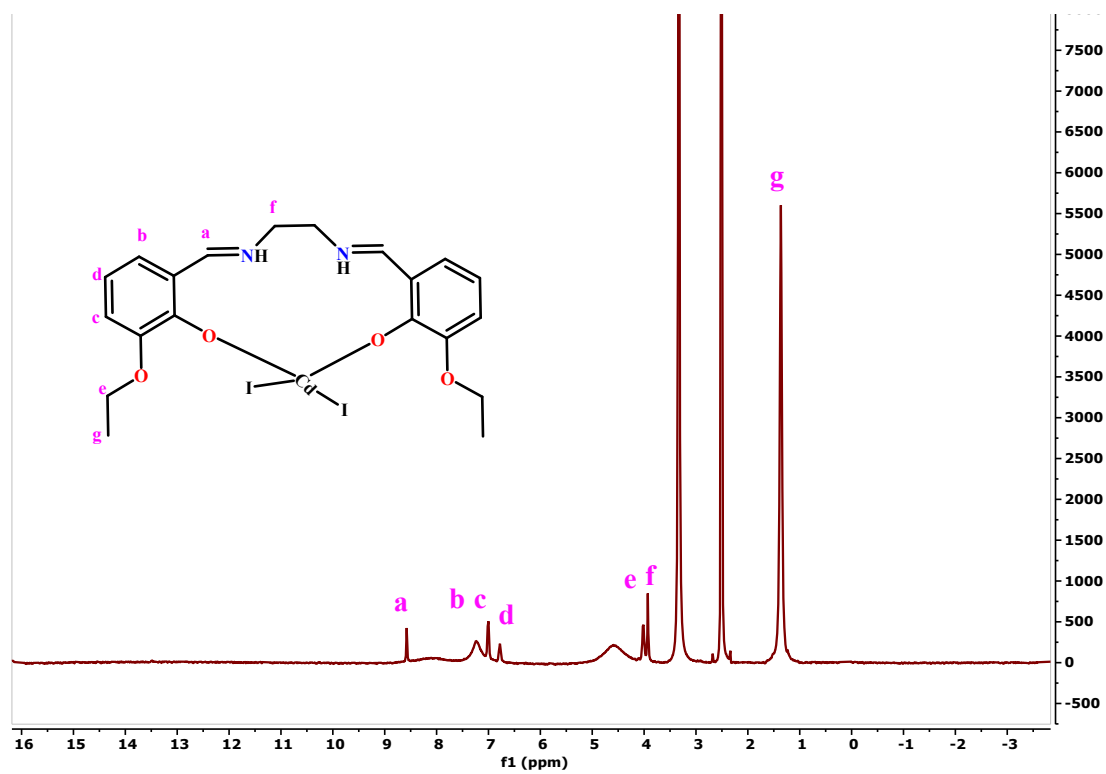

**Fig. S8:** <sup>1</sup>H NMR spectrum of complex 1

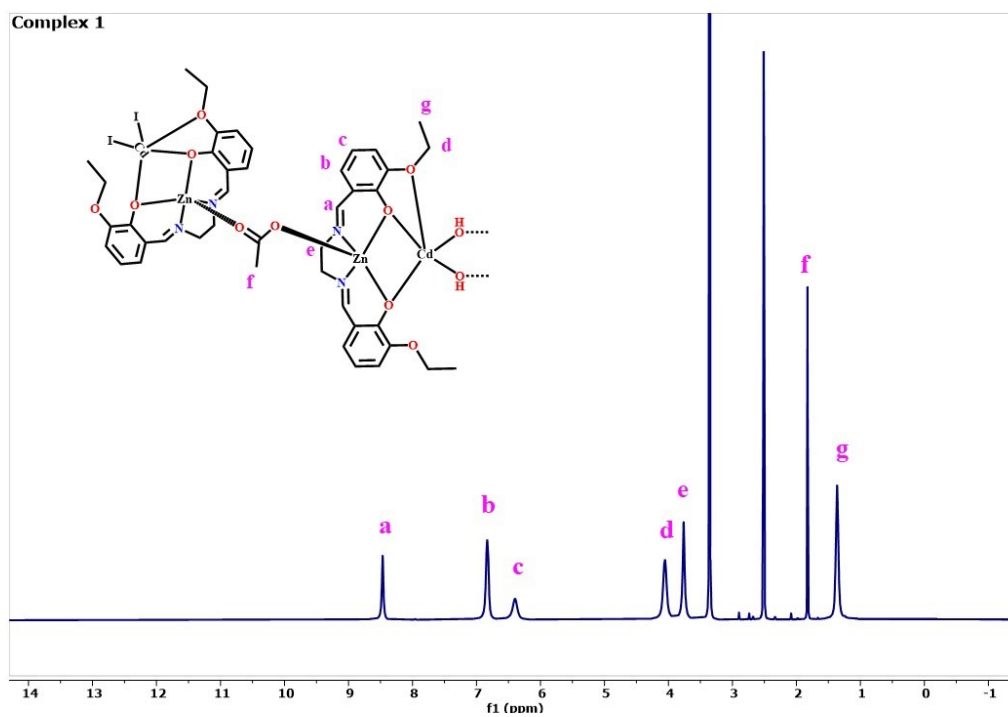

**Fig. S9:** NMR spectrum of complex 2

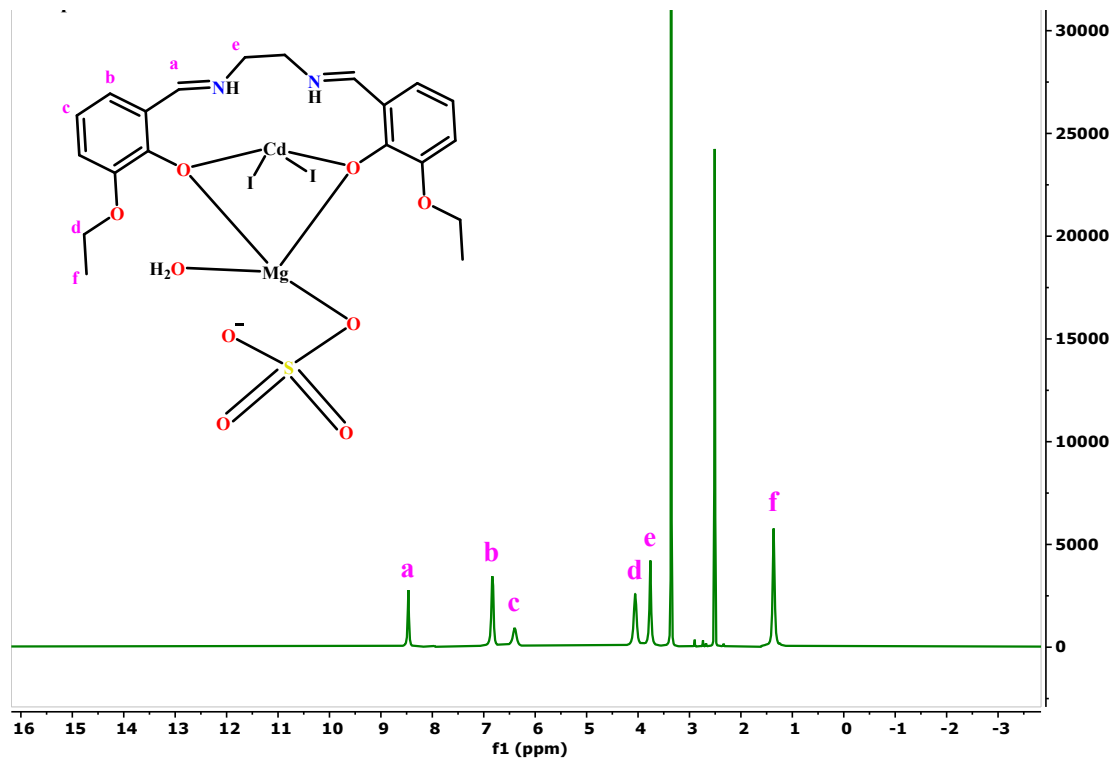

**Fig S10:** NMR spectrum of complex 3

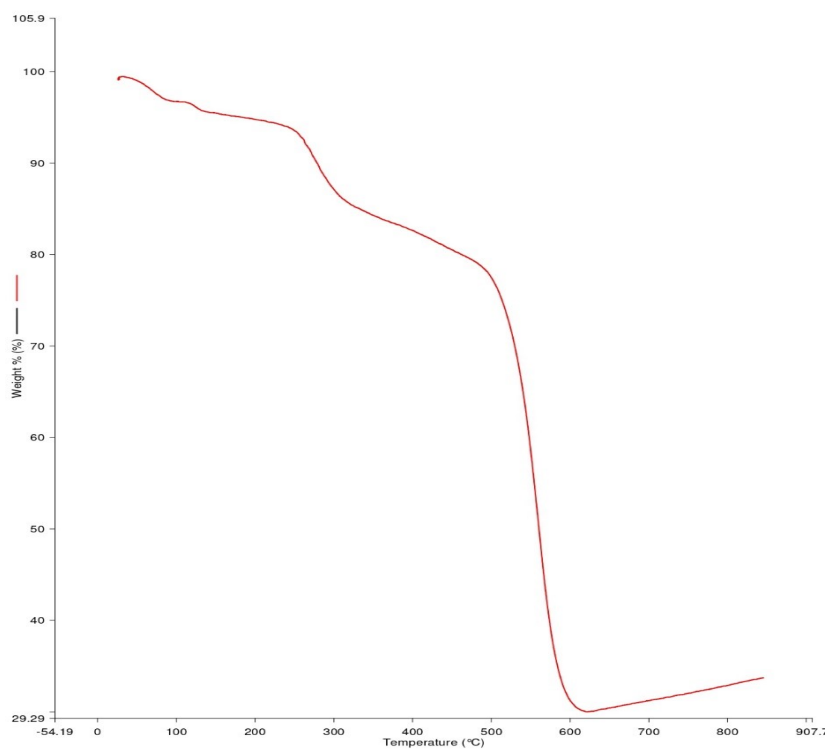

**Fig. S11:** The TGA graph for complex 2

**TGA-DTA plot of complex 2**

Weight loss calculation:

Monoclinic 'C 2/c' space group, Z = 4

Therefore FW = Unitcell contents/Z

= [4 Ligand + 2 CdI<sub>2</sub> + 6 Zn cations + 2 acetate (coordinated) + 2 oxygen atom bridged] + ~ 226 electron [SQUEEZE result]

= 2680 + (7 X 18)

= 2680 + 126 = 2806

Weight loss for 7 H<sub>2</sub>O = 126/2806

= 4.5% (experimental 4.8 %)



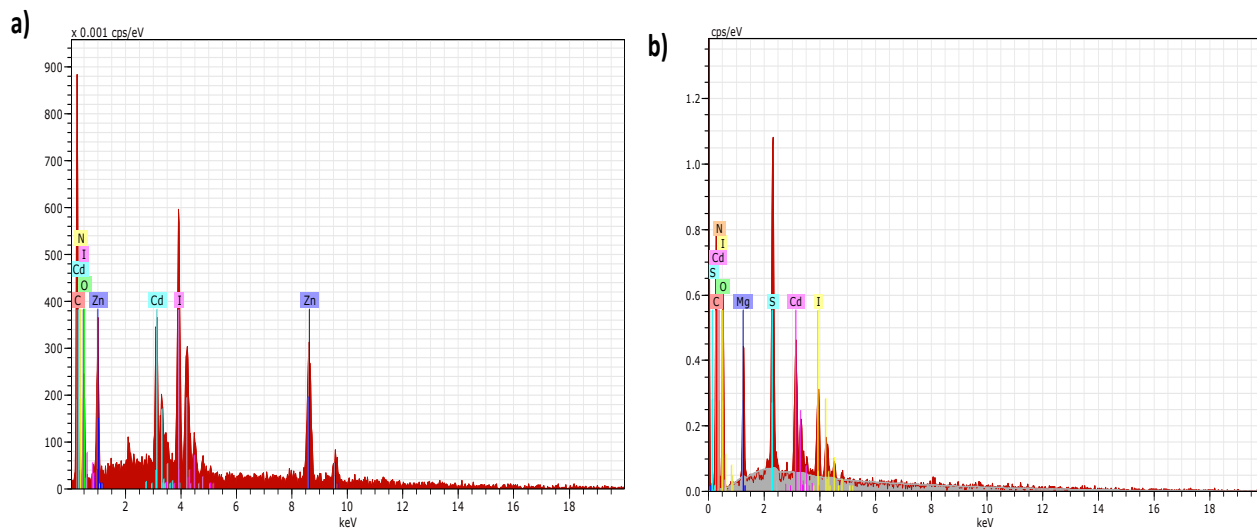

**Figure S12:** EDX result of a) complex 2 b) complex 3

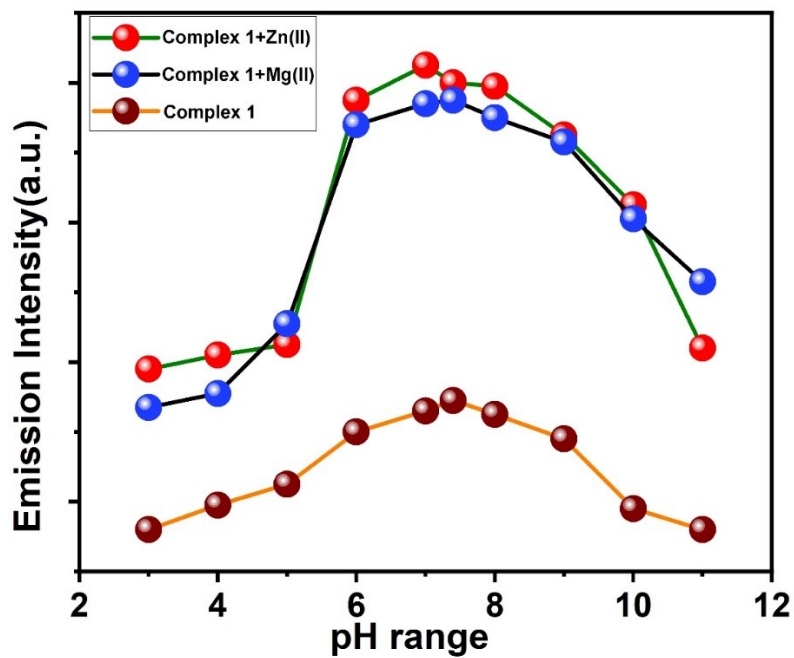

**Figure. S13.** Change of Emission Intensity of the complex 1, 2, 3 with the variation of pH

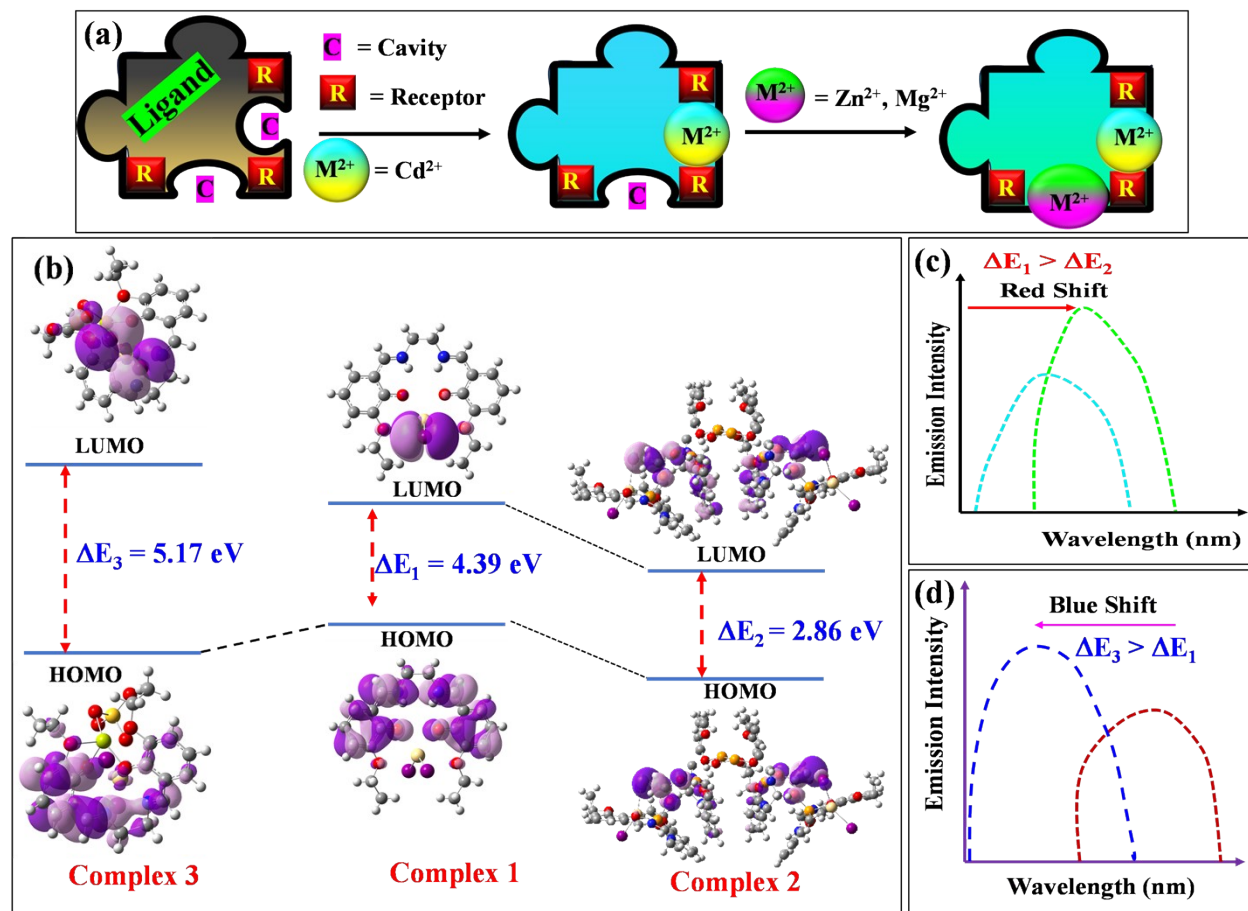

**Fig S14:** Schematic presentation of the mechanism of sensing phenomena of complex 1 towards Zn(II) and Mg(II).

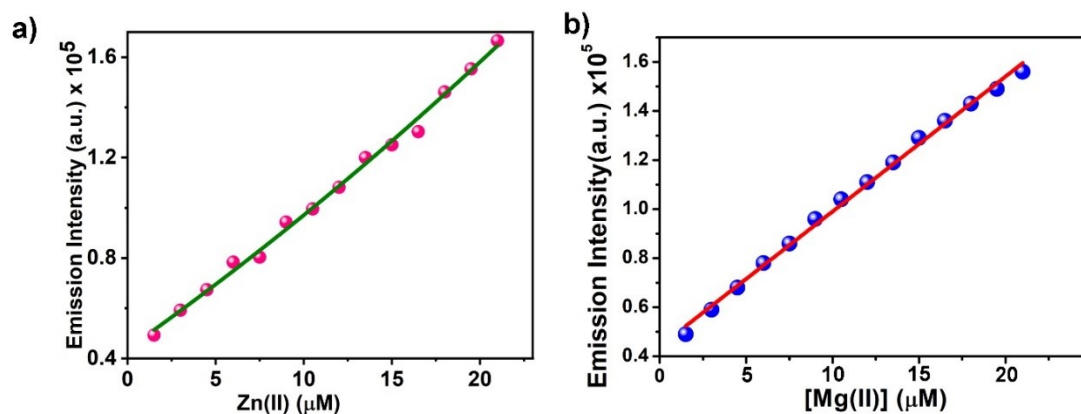

**Fig. S15:** Change of Fluorescence intensity of complex 1 ( $3 \times 10^{-6} \text{ M}$ ) by varying the concentration of (a) Zn(II) ( $1.0 - 25 \times 10^{-6} \text{ M}$ ) in 9:1 ethanol-water medium and (b) Mg(II) ( $1.0 - 25 \times 10^{-6} \text{ M}$ ) in pure HEPES buffer solution for LOD calculation purpose.

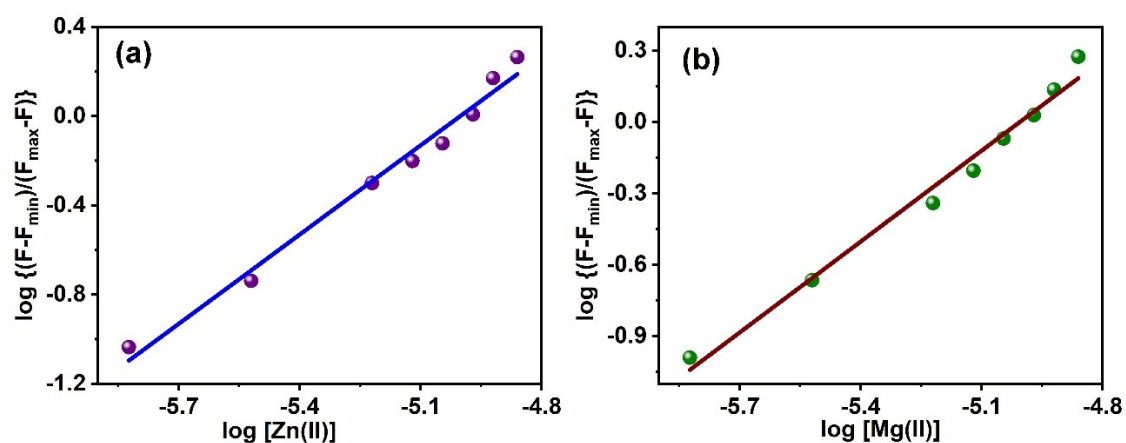

**Fig. S16:** Determination of Binding constant of (a) Complex 1 – Zn(II) and (b) Complex 1 – Mg(II) from Fluorescence titration results

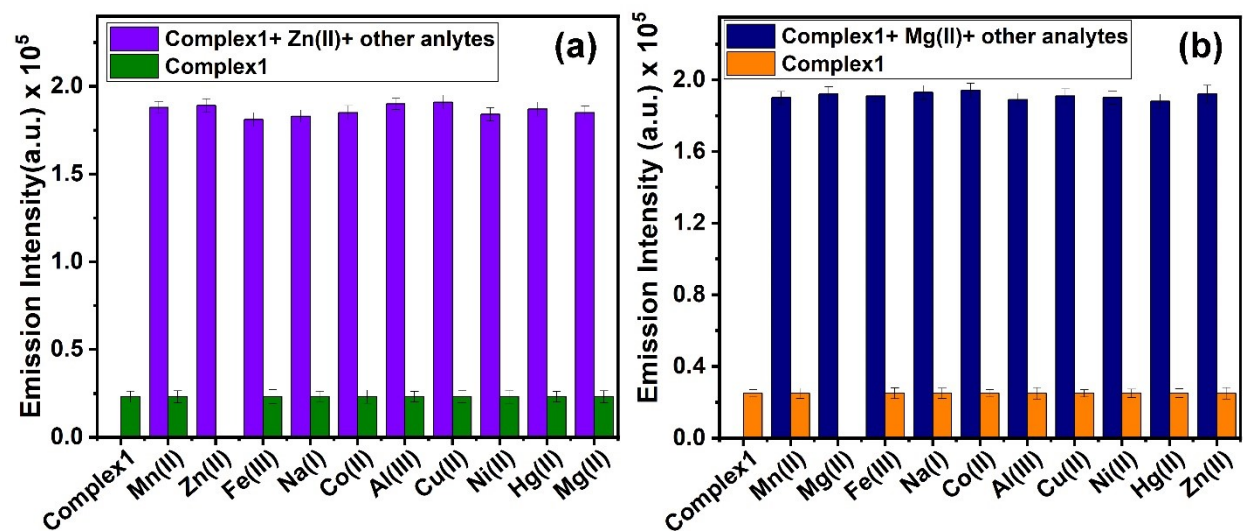

**Fig. S17:** Change of emission intensity of (a) complex1 – Zn(II) and (b) Complex1 – Mg(II) after the addition of several competitive metal ions.

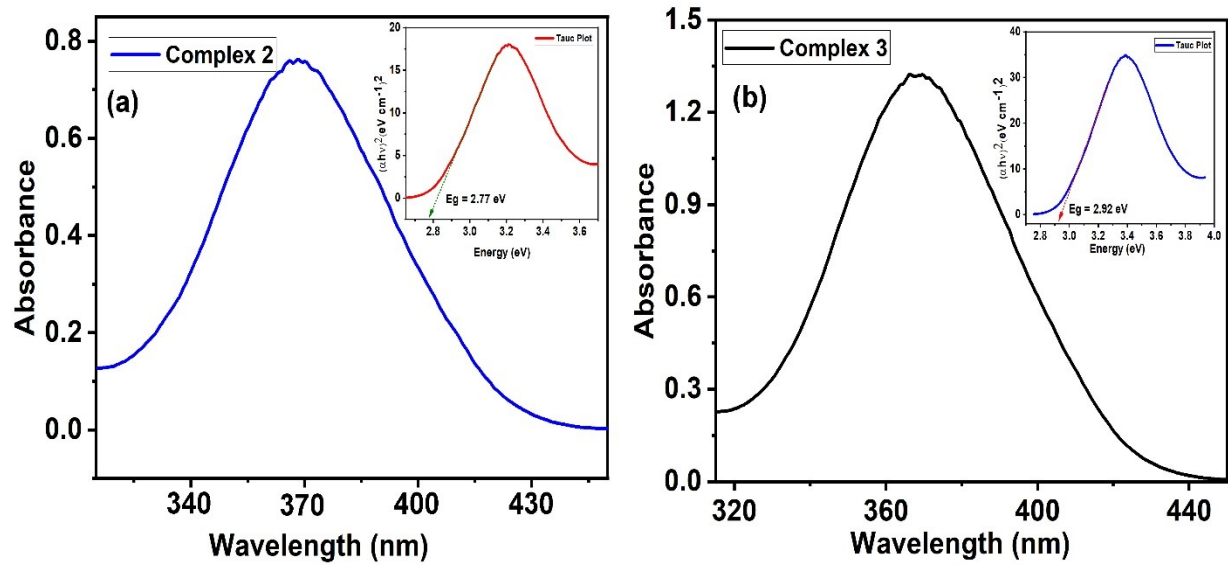

**Fig S18:** The band gap values for a) complex 2 b) complex 3 by using Tauc plot

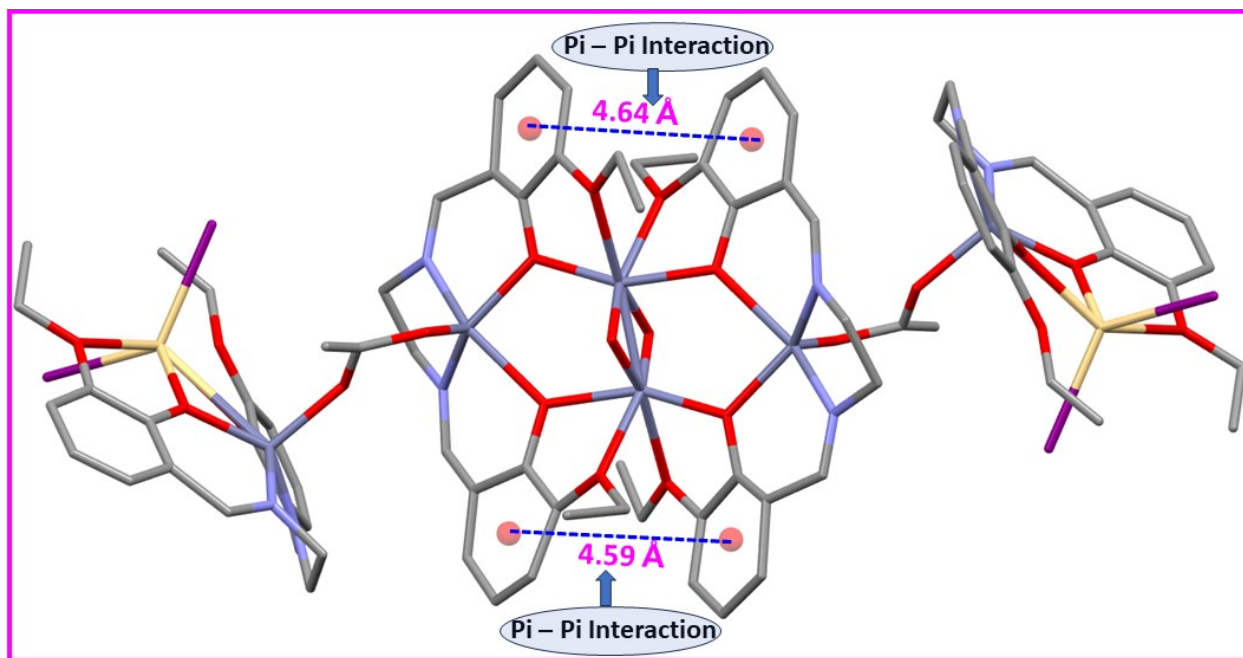

**Fig. S19:** Intramolecular  $\pi$ - $\pi$  interaction in complex 2

**Table S1:** Intra-molecular Hydrogen bonding parameter of complex 1

| D—H...A        | D—H<br>(Å) | H...A<br>(Å) | D...A<br>(Å) | D—H...A<br>(°) | Symmetry<br>operation for A |
|----------------|------------|--------------|--------------|----------------|-----------------------------|
| N(1)—H(1)...O2 | 0.900(19)  | 1.81(3)      | 2.565(3)     | 139(3)         | x, y, z                     |

**Table S2:** C—H... I interaction parameter of complex 2

| C—H...I          | C—H<br>(Å) | H...I<br>(Å) | C...I<br>(Å) | C—H...I<br>(°) | Symmetry<br>operation for A |
|------------------|------------|--------------|--------------|----------------|-----------------------------|
| C(19)—H(19)...I2 | 0.9500     | 3.149        | 3.994        | 148.85         | -x+1, -y+2, -z+1            |

**Table S3:** Crystal parameters of complex 1 and 2

| Crystal parameters | Complex 1                                                                       | Complex 2                                                                                                           |
|--------------------|---------------------------------------------------------------------------------|---------------------------------------------------------------------------------------------------------------------|
| CCDC No.           | 2246285                                                                         | 2246286                                                                                                             |
| Empirical formula  | C <sub>20</sub> H <sub>24</sub> N <sub>2</sub> O <sub>4</sub> I <sub>2</sub> Cd | C <sub>82.99</sub> H <sub>95.81</sub> Cd <sub>2</sub> I <sub>4</sub> N <sub>8</sub> O <sub>22</sub> Zn <sub>6</sub> |
| Formula weight     | 722.61                                                                          | 2681.93                                                                                                             |
| Crystal size/mm    | 0.14 X 0.09 X 0.04                                                              | 0.095 X 0.059 X 0.032                                                                                               |
| Crystal system     | Monoclinic                                                                      | Monoclinic                                                                                                          |
| Space group        | 'P 2/n'                                                                         | 'C 2/c'                                                                                                             |
| a /Å               | 8.6378(19)                                                                      | 37.556(4)                                                                                                           |
| b /Å               | 11.746(3)                                                                       | 12.9596(14)                                                                                                         |
| c /Å               | 11.427(3)                                                                       | 27.018(3)                                                                                                           |
| α/°                | 90                                                                              | 90                                                                                                                  |
| β/°                | 92.577(11)                                                                      | 125.815(3)                                                                                                          |

|                                                                  |                        |                        |
|------------------------------------------------------------------|------------------------|------------------------|
| $\gamma/^\circ$                                                  | 90                     | 90                     |
| Volume/ $\text{\AA}^3$                                           | 1158.2(4)              | 10663.5(19)            |
| Z                                                                | 2                      | 4                      |
| $D_{\text{calc}}/\text{gcm}^{-3}$                                | 2.072                  | 1.669                  |
| F(000)                                                           | 688                    | 5247                   |
| $\mu \text{ MoK}\alpha / \text{mm}^{-1}$                         | 3.636                  | 2.938                  |
| Temperature/K                                                    | 296(2)                 | 148.53                 |
| $R_{\text{int}}$                                                 | 0.0290                 | 0.1179                 |
| Range of h, k, l                                                 | -11/11, -16/14, -15/15 | -42/53, -18/17, -38/31 |
| $\theta_{\text{min/max}}/^\circ$                                 | 2.488/29.423           | 2.189/30.465           |
| Reflections<br>collected/unique/observed<br>[ $I > 2\sigma(I)$ ] | 14233/3200/2631        | 64906/15869/7654       |
| Data/restraints/<br>parameters                                   | 3200/1/137             | 15869/0/636            |
| Goodness of fit on $F^2$                                         | 1.093                  | 1.038                  |
| Final R indices                                                  | $R_1 = 0.0273$         | $R_1 = 0.1379$         |
| [ $I > 2\sigma(I)$ ]                                             | $wR_2 = 0.0396$        | $wR_2 = 0.2328$        |
| R indices (all data)                                             | $R_1 = 0.0493$         | $R_1 = 0.3471$         |
|                                                                  | $wR_2 = 0.0547$        | $wR_2 = 0.4195$        |
